# Supplementary material for: Aryl–aryl coupling via directed lithiation and oxidation
Source: Royal Society of Chemistry journal article supplement (doi:10.1039/b501939g), 2005-01-01

# Aryl-Aryl Coupling via Directed Lithiation and Oxidation

*David S. Surry, David J. Fox, Simon J. F. Macdonald and David R. Spring\**

## Supporting Information

**General Information:**  $^1\text{H}$  NMR Spectra were recorded on Bruker DPX 400 or 500 spectrometers in deuteriochloroform operating at 400 and 500 MHz respectively.  $^{13}\text{C}$  NMR Spectra were recorded on a Bruker 400 or 500 operating at 100 and 125 MHz respectively. Chemical shifts are quoted relative to residual solvent (7.26 ppm for  $\text{CHCl}_3$  and 77.0 ppm for  $^{13}\text{C}$  of  $\text{CDCl}_3$ , 2.54 ppm for DMSO and 40.45 ppm for  $^{13}\text{C}$  of  $\text{d}_6\text{-DMSO}$ ) and coupling constants ( $J$ ) are given in Hz. The following abbreviations are used to indicate the multiplicity of signals: s singlet, d doublet, t triplet, q quartet, dd doublet of doublets, dt doublet of triplets, m multiplet and b broad. NMR spectra were acquired at 300 K unless otherwise indicated. High resolution mass spectroscopic (HRMS) analyses were measured on a Micromass Q-TOF or a Micromass LCT Premier spectrometer at the Department of Chemistry, University of Cambridge or on a Finnigan MAT 900 XLT or a Finnigan MAT 95XP spectrometer at the EPSRC National Mass Spectrometry Service Centre, Swansea. Infrared spectra were recorded on a Perkin Elmer 1 FT-IR Spectrometer fitted with an Attenuated Total Reflectance (ATR) sampling accessory as thin films or flattened solids. Absorption maxima ( $\nu_{\text{max}}$ ) are reported in wavenumbers ( $\text{cm}^{-1}$ ). Optical rotations were recorded on a Perkin Elmer 343 polarimeter.  $[\alpha]_D^{25}$  values are reported in  $10^{-1} \text{ deg cm}^2 \text{ g}^{-1}$  at 589 nm, concentration ( $c$ ) is given in  $\text{g(100mL)}^{-1}$ .

Melting points were determined on a Reichert hot stage apparatus and are uncorrected.

Full spectral data for all novel compounds are given below, all previously characterised compounds gave spectra consistent with the literature.

Except as otherwise indicated, reactions were carried out in oven-dried glassware under an atmosphere of nitrogen with dry, freshly distilled solvents. Tetrahydrofuran was distilled from  $\text{LiAlH}_4$  with triphenylmethane as indicator. All chemicals were purchased from The Aldrich Chemical Company or Avocado. Copper(I) bromide-dimethyl sulfide complex was purified before use according to the procedure of House.<sup>1</sup>  $i\text{-PrMgCl}$  solution was titrated with 1,10-phenanthroline and menthol before use. All flash chromatography was carried out using slurry-packed Merck 9385 Kieselgel 60 silica gel.

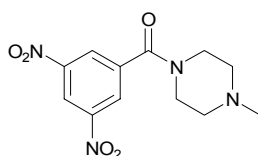

**Synthesis of 3:** 3,5-Dinitrobenzoic acid (21.2 g, 0.1 mol) was dissolved in thionyl chloride (100 mL), the solution heated at reflux for 10 h and then allowed to cool to 20 °C. Excess thionyl chloride was removed under reduced pressure and by azeotropic distillation with toluene. The residue was dissolved in chloroform (200 mL) and added dropwise to a stirred slurry of 1-methylpiperazine (12.0 g, 0.12 mol) and potassium carbonate (14 g, 0.1 mol) in chloroform (200 mL) at 0 °C. The reaction mixture was allowed to warm to 20 °C over 1 h and then washed with water (4 × 400 mL), dried ( $\text{K}_2\text{CO}_3$ ) and the solvent removed under reduced pressure. The residue was recrystallized (hexanes) as yellow needles (20.4 g, 70%); mp 138-141 °C;  $\nu_{\text{max}}(\text{film})/\text{cm}^{-1}$  1633, 1531, 1435, 1339, 1295, 1277, 1133, 995, 917,

908, 720, 681;  $\delta_{\text{H}}$  (500 MHz;  $\text{d}_6$ -DMSO; 393 K) 8.87 (1 H, t,  $J$  2.0), 8.56 (2 H, d,  $J$  2.0), 3.54 (4 H, br), 2.42 (4 H, t,  $J$  5.0), 2.27 (3 H, s);  $\delta_{\text{C}}$  (125 MHz;  $\text{d}_6$ -DMSO; 393 K) 165.5, 149.1, 139.8, 127.6, 119.4, 54.7, 45.7; HRMS found ESI  $[\text{M}+\text{H}]^+$  295.1042,  $[\text{C}_{12}\text{H}_{15}\text{N}_4\text{O}_5]^+$  requires 295.1043.

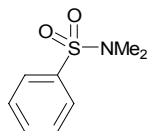

**1d:** Benzenesulfonyl chloride (20 mmol, 2.6 mL) was added to a vigorously stirred solution of dimethylamine (22 mmol, 11 mL of 2 M solution in THF) in THF (10 mL) and water (10 mL) at 0 °C. The solution was allowed to warm to ambient temperature, the organic layer separated, washed with water and brine, dried ( $\text{MgSO}_4$ ) and the solvent removed under reduced pressure. The residue was purified by recrystallization from hexane/toluene to yield the sulfonamide as white plates mp 45-47 °C (lit.,<sup>2</sup> 51-52 °C);  $\nu_{\text{max}}(\text{film})/\text{cm}^{-1}$  1445, 133.2, 1164, 1090, 949, 731, 693, 682;  $\delta_{\text{H}}$  (500 MHz;  $\text{CDCl}_3$ ) 7.79 (2 H, dd,  $J$  6.0, 1.0), 7.60 (1 H, td,  $J$  6.0, 1.5), 7.56 (2 H, td,  $J$  6.5, 1.5), 2.72 (6 H, s);  $\delta_{\text{C}}$  (125 MHz;  $\text{CDCl}_3$ ) 135.5, 132.7, 129.0, 127.7, 37.9; HRMS found ESI  $[\text{M}+\text{H}]^+$  186.0583,  $[\text{C}_8\text{H}_{11}\text{O}_2\text{NS}]^+$  requires 186.0583.

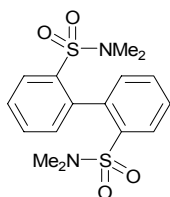

**2d:** mp 133-135 °C;  $\nu_{\text{max}}(\text{film})/\text{cm}^{-1}$  1456, 1341, 1318, 1258, 1155, 1084, 1064, 953, 782, 772, 750, 734, 705, 680, 666;  $\delta_{\text{H}}$  (500 MHz;  $\text{CDCl}_3$ ) 7.91 (2 H, dd,  $J$  8.0, 1.5), 7.50 (2 H, td,  $J$  7.5, 1.5), 7.45 (2 H, td,  $J$  7.5, 1.5), 7.29 (2 H, dd,  $J$  7.5, 1.5), 2.52

(12 H, s);  $\delta_{\text{C}}$  (125 MHz;  $\text{CDCl}_3$ ) 138.3, 137.2, 132.6, 131.2, 129.2, 128.1, 36.8;

HRMS found ESI  $[\text{M}+\text{Na}]^+$  391.0746,  $[\text{C}_{16}\text{H}_{20}\text{O}_4\text{NaN}_2\text{S}_2]^+$  requires 391.0757.

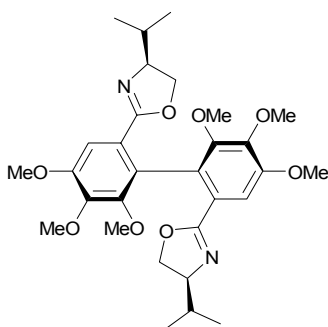

(*M*)-**5**:<sup>3</sup>  $[\alpha]_D^{25} = -26.8$  ( $c = 3.3$ ,  $\text{CHCl}_3$ );  $\nu_{\text{max}}(\text{film})/\text{cm}^{-1}$  2956, 1651, 1594, 1488, 1462,

1392, 1358, 1242, 1207, 1167, 1101, 1026, 1006, 983, 923, 751;  $\delta_{\text{H}}$  (500 MHz;

$\text{CDCl}_3$ ) 7.14 (2 H, s), 4.03 (2 H, t,  $J$  8.0), 3.91 (6 H, s), 3.90 (6 H, s), 3.77 (2 H, m),

3.74 (2 H, q,  $J$  7.5), 3.69 (6 H, s), 1.54 (2 H, septet,  $J$  6.5), 0.74 (6 H, d,  $J$  7.0), 0.73

(6 H, d,  $J$  7.0);  $\delta_{\text{C}}$  (125 MHz;  $\text{CDCl}_3$ ) 163.4, 152.3, 152.0, 143.9, 125.4, 123.4, 107.9,

72.5, 70.0, 60.7, 60.4, 56.0, 31.9, 18.7, 18.2; HRMS found ESI  $[\text{M}+\text{Na}]^+$  579.2682,

$[\text{C}_{30}\text{H}_{40}\text{O}_8\text{NaN}_2]^+$  requires 579.2785.

## References

1. H. O. House, C.-Y. Chu, J. M. Wilkins, M. J. Umen, *J. Org. Chem.*, **1975**, *40*, 1460.
2. V. I. Naddaka, K. V. Avanesyan, M. L. Cherkinskaya, V. I. Minkin, *J. Org. Chem. USSR*, **1987**, *23*, 801.
3. For spectral data of the diastereoisomer see T. D. Nelson, A. I. Meyers, *J. Org. Chem.*, **1994**, *59*, 2577.

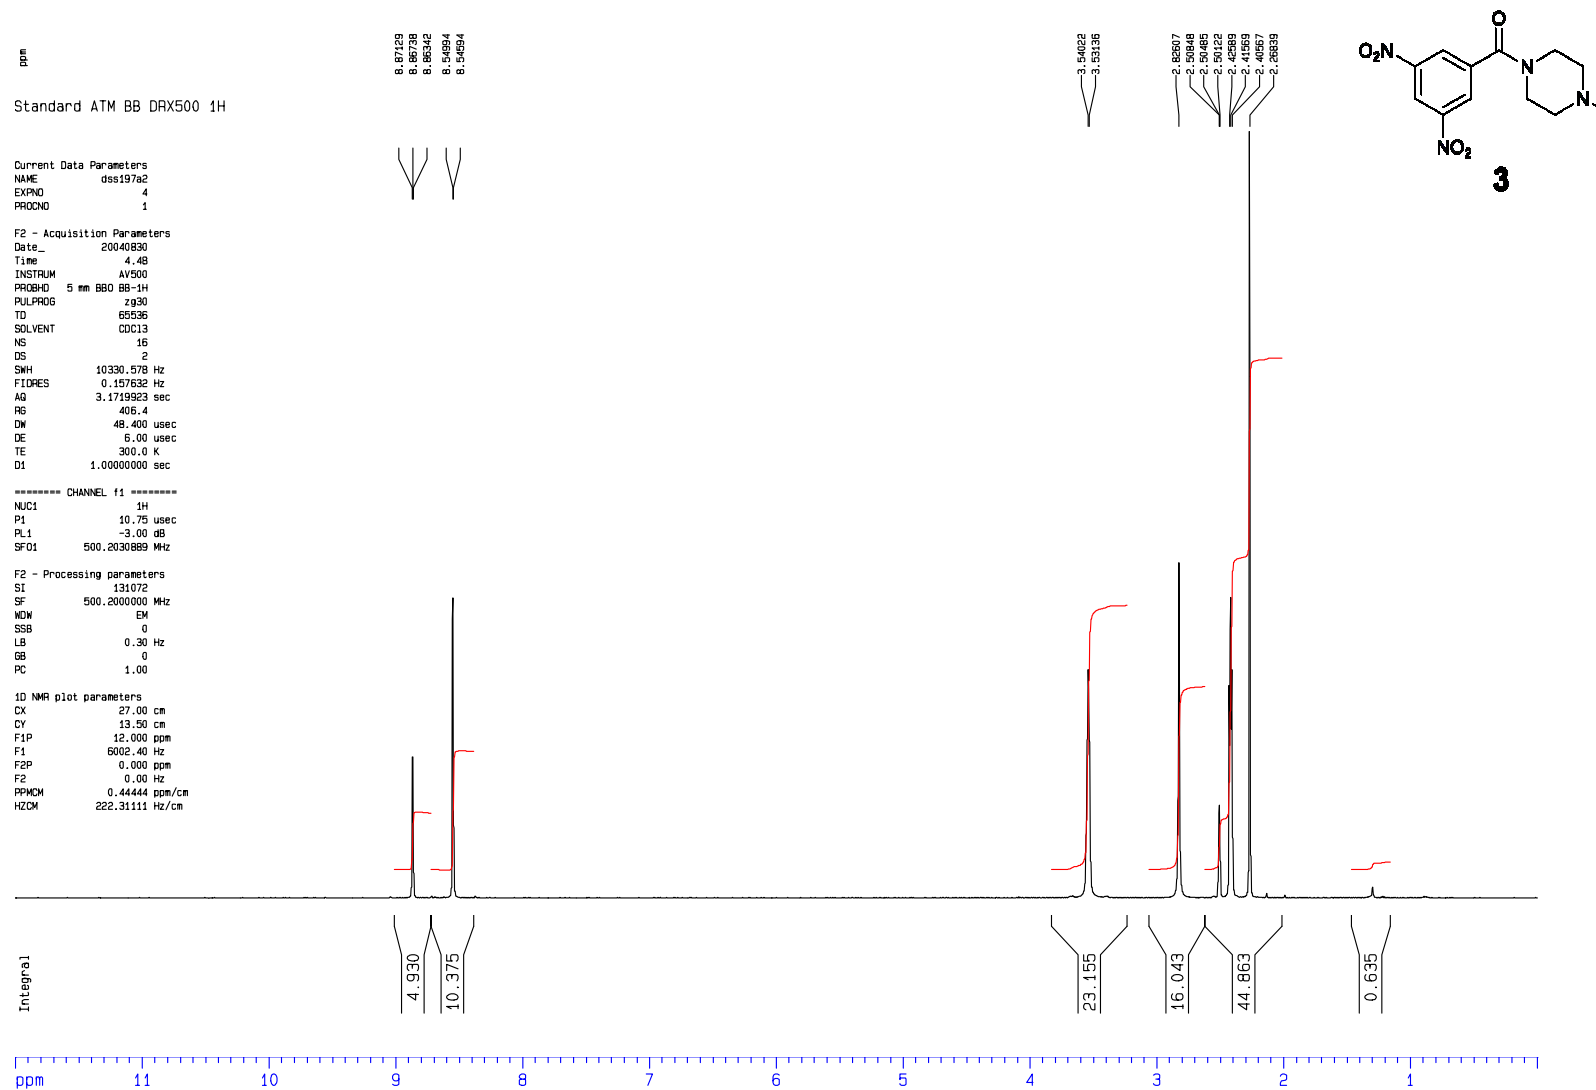

Standard ATM BB DRX500 13C

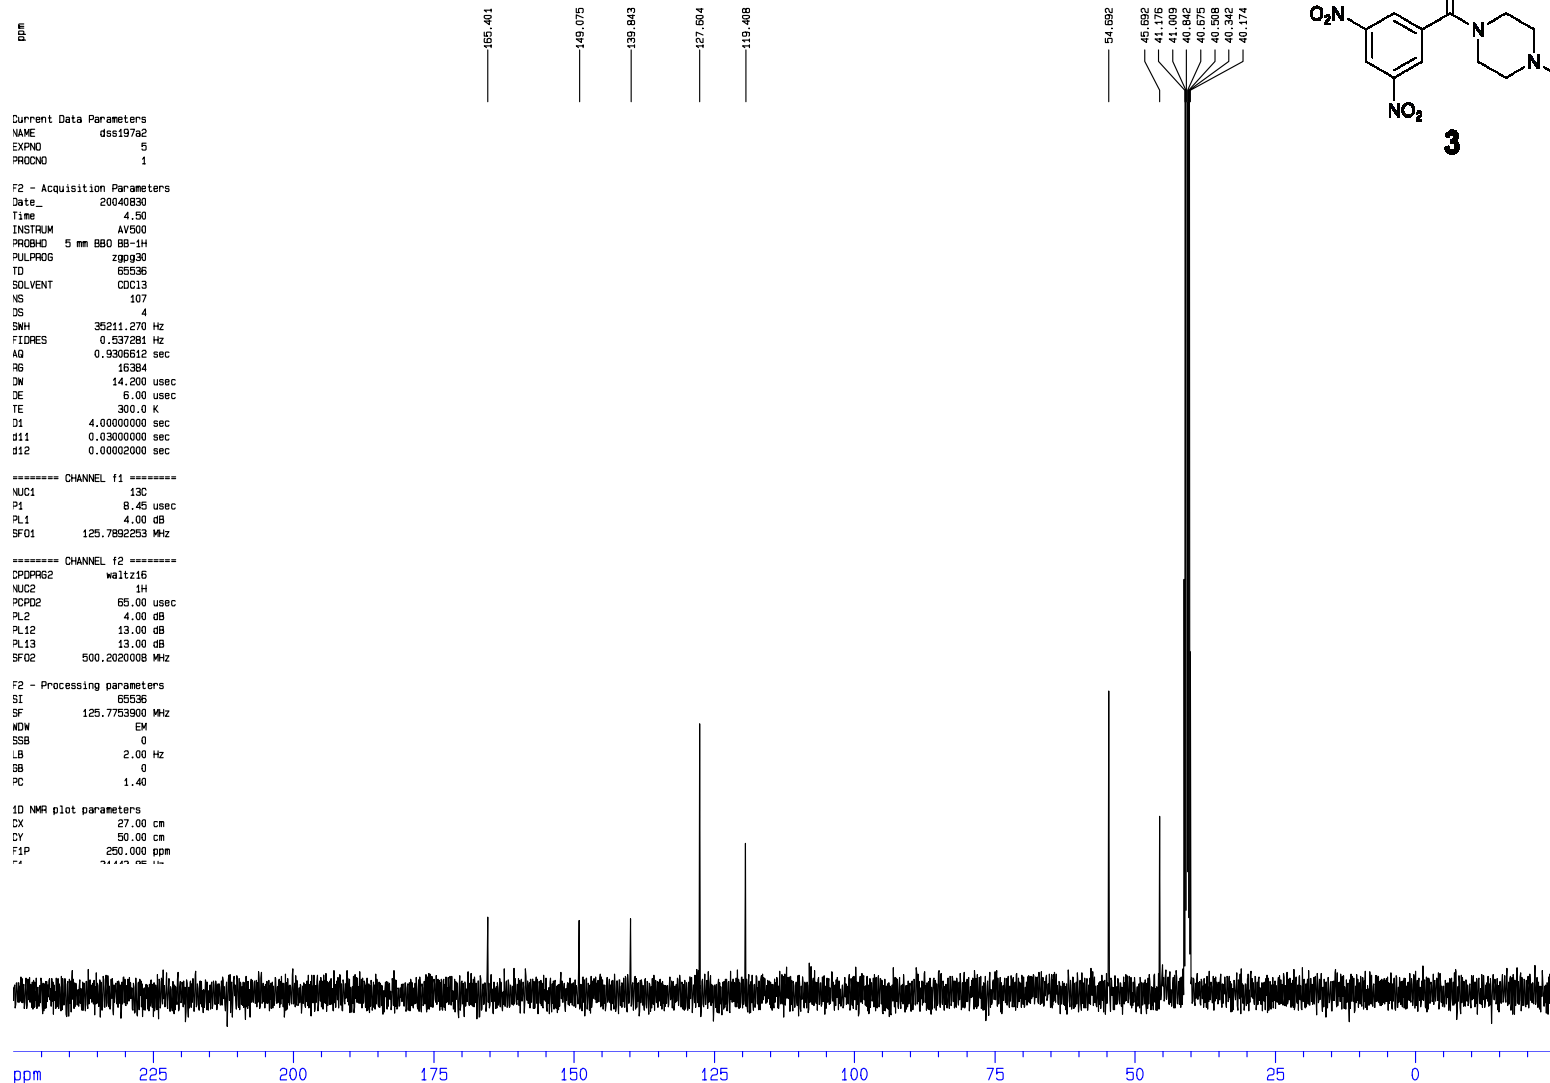

ppm

proton.std CDC13 {d:\data\drs} dss29 1

Current Data Parameters  
NAME dss1811  
EXPNO 10  
PROCNO 1

F2 - Acquisition Parameters  
Date\_ 20040210  
Time 19.47  
INSTRUM AV500  
PROBHD 5 mm BBO BB-1H  
PULPROG zg30  
TD 65536  
SOLVENT CDC13  
NS 16  
DS 2  
SWH 10330.578 Hz  
FIDRES 0.157632 Hz  
AQ 3.1719823 sec  
RG 114  
DW 48.400 usec  
DE 6.00 usec  
TE 300.0 K  
D1 1.00000000 sec

===== CHANNEL f1 =====  
NUC1 1H  
P1 10.75 usec  
PL1 -3.00 dB  
SFO1 500.2030889 MHz

F2 - Processing parameters  
SI 32768  
SF 500.2000000 MHz  
WDW EM  
SSB 0  
LB 0.30 Hz  
GB 0  
PC 1.00

1D NMR plot parameters  
CX 27.00 cm  
CY 30.00 cm  
F1P 12.000 ppm  
F1 6002.40 Hz  
F2P 0.000 ppm  
F2 0.00 Hz  
PPMCM 0.44444 ppm/cm  
HZCM 222.31111 Hz/cm

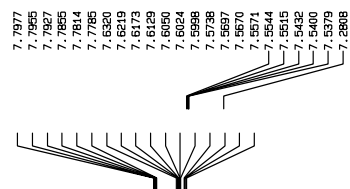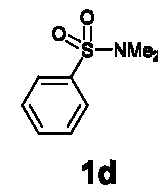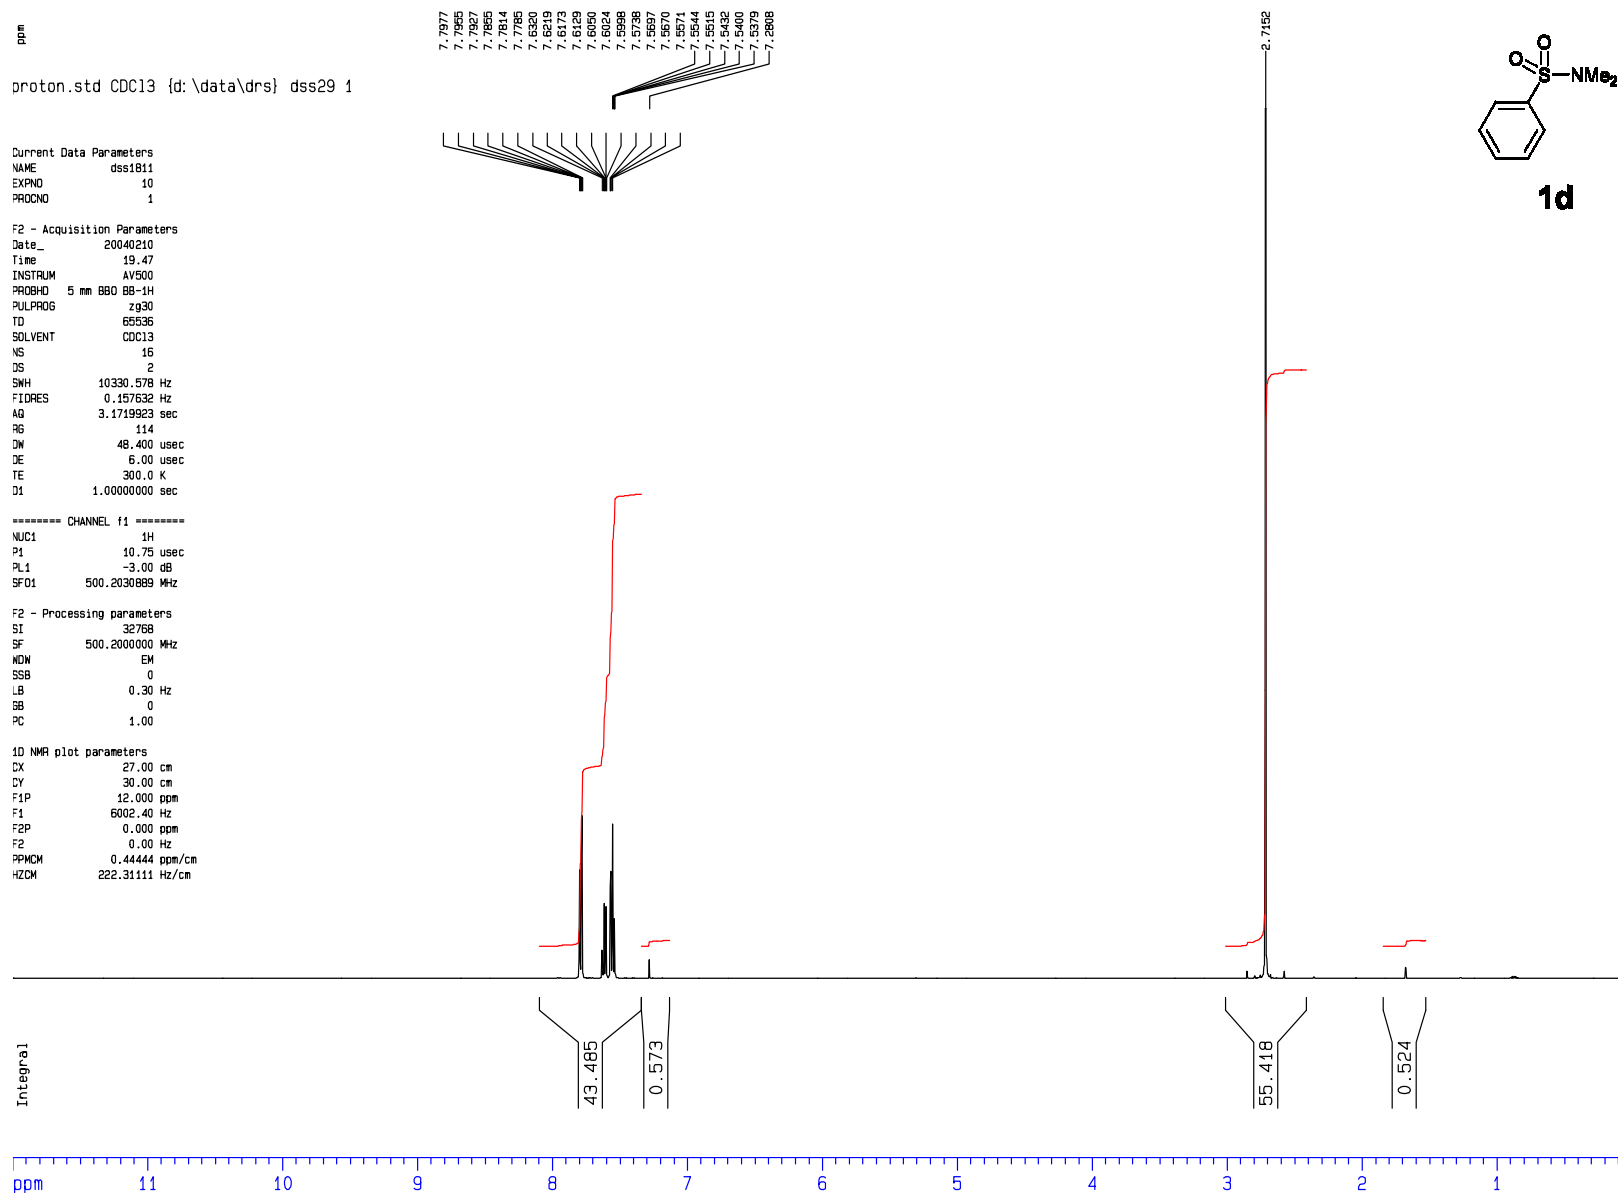

ppm

Current Data Parameters  
NAME dss1811  
EXPNO 12  
PROCNO 1

F2 - Acquisition Parameters  
Date\_ 20040210  
Time 21.13  
INSTRUM AV500  
PROBHD 5 mm BBO BB-1H  
PULPROG zgpg30  
TD 65536  
SOLVENT CDC13  
NS 800  
DS 4  
SWH 35211.270 Hz  
FIDRES 0.537281 Hz  
AQ 0.9306612 sec  
RG 16384  
DW 14.200 usec  
DE 6.00 usec  
TE 300.0 K  
D1 4.0000000 sec  
d11 0.0300000 sec  
d12 0.0002000 sec

===== CHANNEL f1 =====  
NUC1 13C  
P1 8.45 usec  
PL1 4.00 dB  
SF01 125.7692253 MHz

===== CHANNEL f2 =====  
CPDPRG2 waltz16  
NUC2 1H  
PCPD2 65.00 usec  
PL2 -3.00 dB  
PL12 13.00 dB  
PL13 13.00 dB  
SF02 500.2020008 MHz

F2 - Processing parameters  
SI 65536  
SF 125.7753900 MHz  
WDW EM  
SSB 0  
LB 2.00 Hz  
GB 0  
PC 1.40

1D NMR plot parameters  
CX 27.00 cm  
CY 0.00 cm  
F1P 250.000 ppm  
F4 34.443 dB uV

135.549  
132.705  
129.018  
128.817  
128.217  
127.924  
127.879  
127.712  
127.463

77.322  
77.068  
76.814

37.926

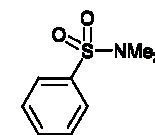**1d**

ppm 225 200 175 150 125 100 75 50 25 0



ppm

proton.std CDC13 {d:\data\drs} dss29 2

Current Data Parameters  
NAME dss1841  
EXPNO 13  
PROCNO 1

F2 - Acquisition Parameters  
Date\_ 20040210  
Time 13.20  
INSTRUM AV500  
PROBHD 5 mm BBO BB-1H  
PULPROG zg30  
TD 65536  
SOLVENT CDC13  
NS 16  
DS 2  
SWH 10330.578 Hz  
FIDRES 0.157632 Hz  
AQ 3.1719923 sec  
RG 71.8  
DM 48.400 usec  
DE 6.00 usec  
TE 300.0 K  
D1 1.00000000 sec

\*\*\*\*\* CHANNEL f1 \*\*\*\*\*  
NUC1 1H  
P1 10.75 usec  
PL1 -3.00 dB  
SFO1 500.2030889 MHz

F2 - Processing parameters  
SI 32768  
SF 500.2000423 MHz  
WDW EM  
SSB 0  
LB 0.30 Hz  
GB 0  
PC 1.00

1D NMR plot parameters  
CX 27.00 cm  
CY 13.50 cm  
F1P 12.000 ppm  
F1 6002.40 Hz  
F2P 0.000 ppm  
F2 0.00 Hz  
PPMCM 0.44444 ppm/cm  
HZCM 222.31113 Hz/cm

7.91728  
7.91472  
7.91216  
7.89884  
7.45954  
7.45658  
7.45454  
7.45156  
7.45197  
7.45252  
7.44843  
7.44355  
7.30339  
7.30052  
7.28829  
7.28561

1.0000  
2.0643  
1.0195

2.52291

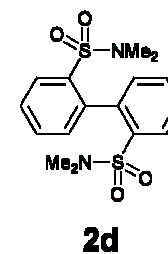

Integral

6.1839

ppm 11 10 9 8 7 6 5 4 3 2 1

carbon.std CDC13 (d:\data\drs) dss29 2

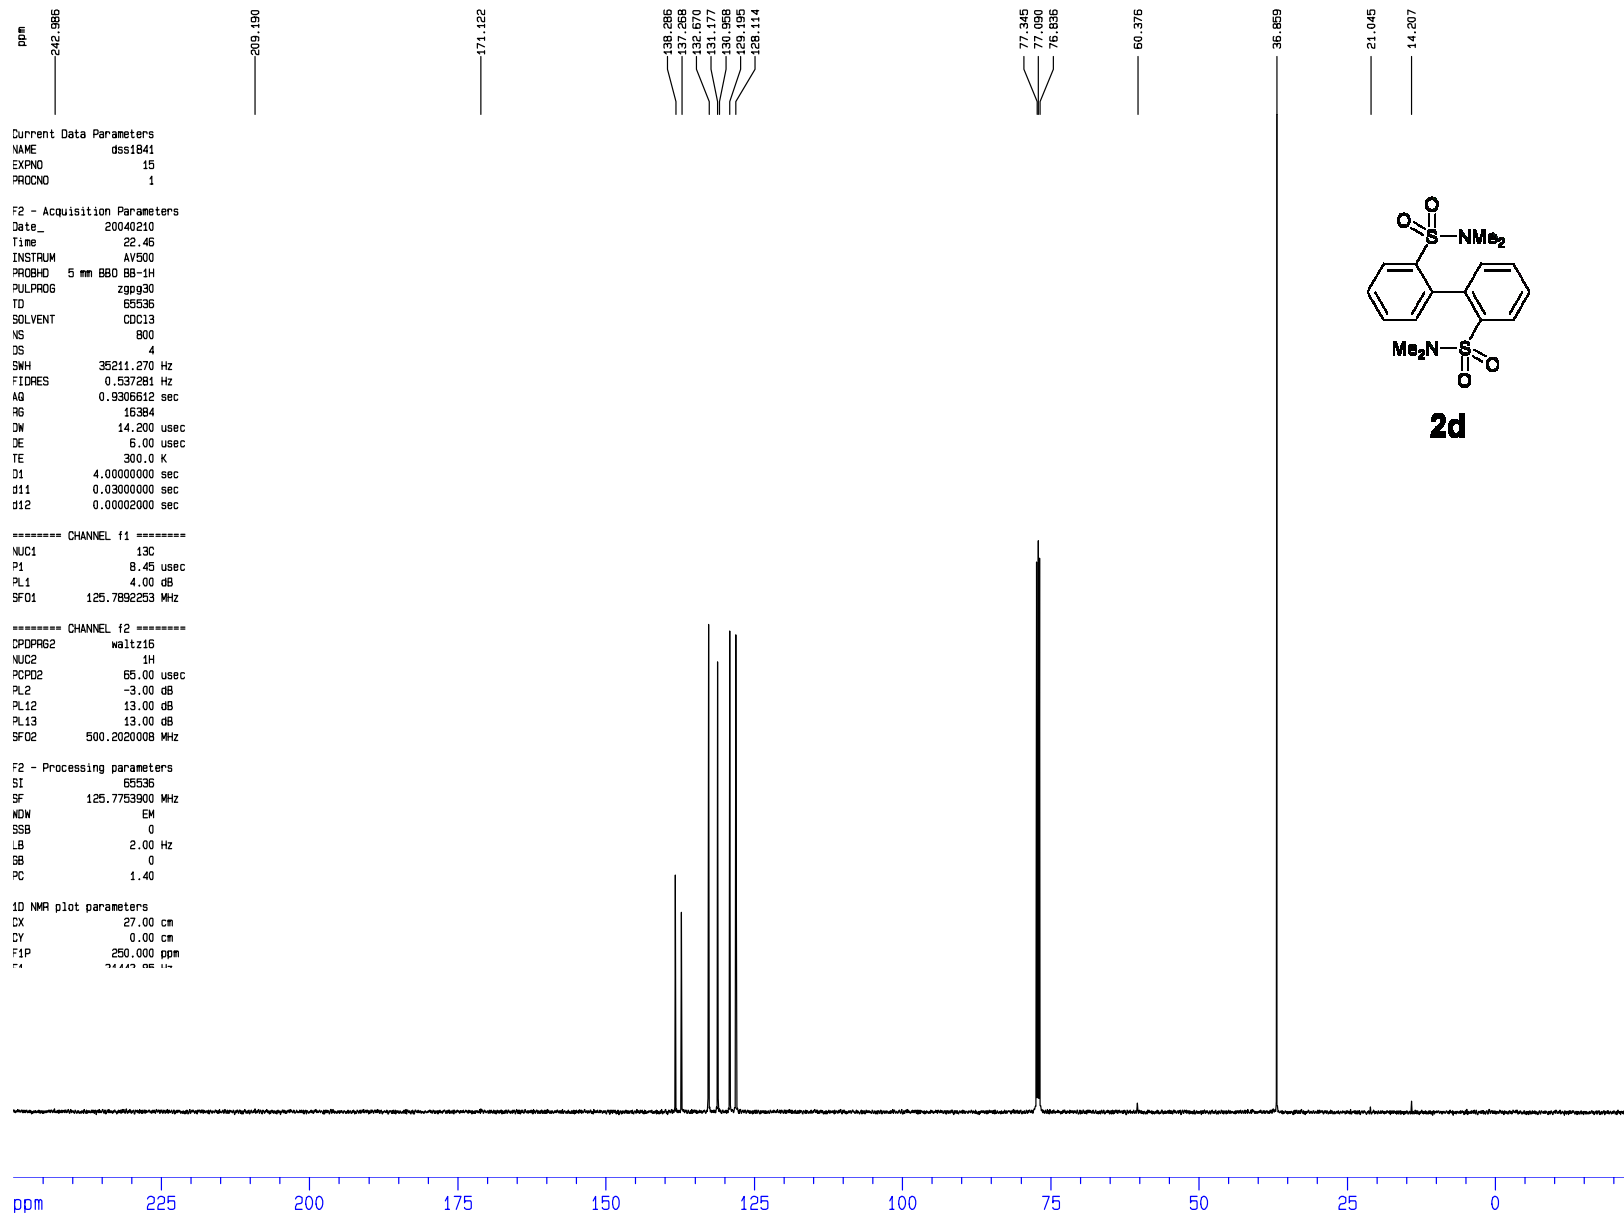

ppm

Standard ATM BB DRX500 1H

Current Data Parameters  
NAME dss122r3  
EXPNO 1  
PROCNO 1

F2 - Acquisition Parameters  
Date\_ 20030917  
Time 10.06  
INSTRUM AV500  
PROBHD 5 mm BBO BB-1H  
PULPROG zg30  
TD 65536  
SOLVENT CDCl3  
NS 16  
DS 2  
SWH 10330.578 Hz  
FIDRES 0.157632 Hz  
AQ 3.1719923 sec  
RG 32  
DW 48.400 usec  
DE 6.00 usec  
TE 300.0 K  
D1 1.00000000 sec

\*\*\*\*\* CHANNEL f1 \*\*\*\*\*  
NUC1 1H  
P1 10.75 usec  
PL1 -3.00 dB  
SFO1 500.2030889 MHz

F2 - Processing parameters  
SI 32768  
SF 500.2000000 MHz  
WDW EM  
SSB 0  
LB 0.30 Hz  
GB 0  
PC 1.00

1D NMR plot parameters  
CX 27.00 cm  
CY 13.50 cm  
F1P 12.000 ppm  
F1 6002.40 Hz  
F2P 0.000 ppm  
F2 0.00 Hz  
PPMCM 0.44444 ppm/cm  
HZCM 222.31111 Hz/cm

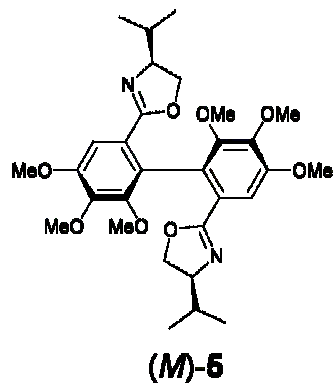

7.1366

4.0436  
4.0259  
3.9920  
3.9220  
3.9199  
3.9088  
3.9000  
3.8916  
3.8924  
3.7869  
3.7728  
3.7687  
3.7561  
3.7455  
3.7346  
3.7146  
3.6885  
3.6454

1.5595  
1.5555  
1.5420  
1.5288  
1.2459  
1.0984  
0.8781  
0.8684  
0.8546  
0.8374  
0.8239  
0.7511  
0.7375  
0.7240  
0.7057

Integral

3.447

36.928

59.624

ppm

11

10

9

8

6

5

4

3

2

1

Standard ATM BB DRX500 13C

ppm

Current Data Parameters  
NAME dss122r3  
EXPNO 2  
PROCNO 1

F2 - Acquisition Parameters  
Date\_ 20030917  
Time 10.17  
INSTRUM AV500  
PROBHD 5 mm BBO BB-1H  
PULPROG zgpg30  
TD 65536  
SOLVENT CDCl3  
NS 205  
DS 4  
SWH 36211.270 Hz  
FIDRES 0.537281 Hz  
AQ 0.9306612 sec  
RG 16384  
DM 14.200 usec  
DE 6.00 usec  
TE 300.0 K  
D1 4.00000000 sec  
d11 0.03000000 sec  
d12 0.00002000 sec

===== CHANNEL f1 =====  
NUC1 13C  
P1 8.45 usec  
PL1 4.00 dB  
SF01 125.769253 MHz

===== CHANNEL f2 =====  
DPDPRG2 waitz16  
NUC2 1H  
PCPD2 65.00 usec  
PL2 4.00 dB  
PL12 13.00 dB  
PL13 13.00 dB  
SF02 500.202008 MHz

F2 - Processing parameters  
SI 65536  
SF 125.7753900 MHz  
WDW EM  
SSB 0  
LB 2.00 Hz  
GB 0  
PC 1.40

1D NMR plot parameters  
CX 27.00 cm  
CY 0.00 cm  
F1P 250.000 ppm  
F4 244.470 MHz

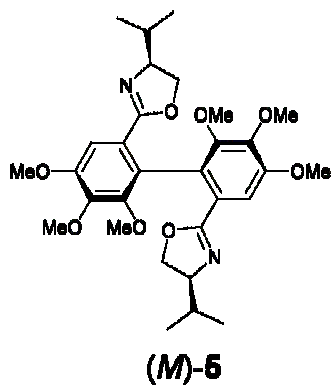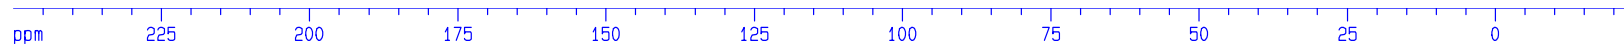

Supplement: b501939g.pdf [file b501939g.pdf]
